# Supplementary material for: Bioengineering of Genetically Encoded Gene Promoter Repressed by the Flavonoid Apigenin for Constructing Intracellular Sensor for Molecular Events
Source: Biosensors (Basel). 2021 Apr 28;11(5):137. doi: 10.3390/bios11050137 (PMC8147076; doi:10.3390/bios11050137)
Supplement: Supplementary file 1 [file biosensors-11-00137-s001.zip › biosensors-1132903-supplementary.pdf]

# Bioengineering of Genetically Encoded Gene Promoter Repressed by the Flavonoid Apigenin for Constructing Intracellular Sensor for Molecular Events

<sup>1</sup> Department of Biomedical Engineering, Michigan State University, East Lansing, MI 48824, USA; nicole.m.desmet.gr@dartmouth.edu (N.M.D.); kalyani.dhusia@einsteinmed.org (K.D.); qiwenjie@msu.edu (W.Q.); sbhattac@msu.edu (S.B.)

<sup>2</sup> Division of Synthetic Biology and Regenerative Medicine, Institute for Quantitative Health Science and Engineering, Michigan State University, East Lansing, MI 48824, USA

<sup>3</sup> Department of Physiology, Michigan State University, East Lansing, MI 48824, USA; doseffan@msu.edu

<sup>4</sup> Department of Pharmacology and Toxicology, Michigan State University, East Lansing, MI 48824, USA

<sup>5</sup> Department of Radiology, Michigan State University, East Lansing, MI 48824, USA

\* Correspondence: gilad@msu.edu

To simulate the ligand-receptor binding, the AHR/ARNT complex was used, shown in Figure S1.

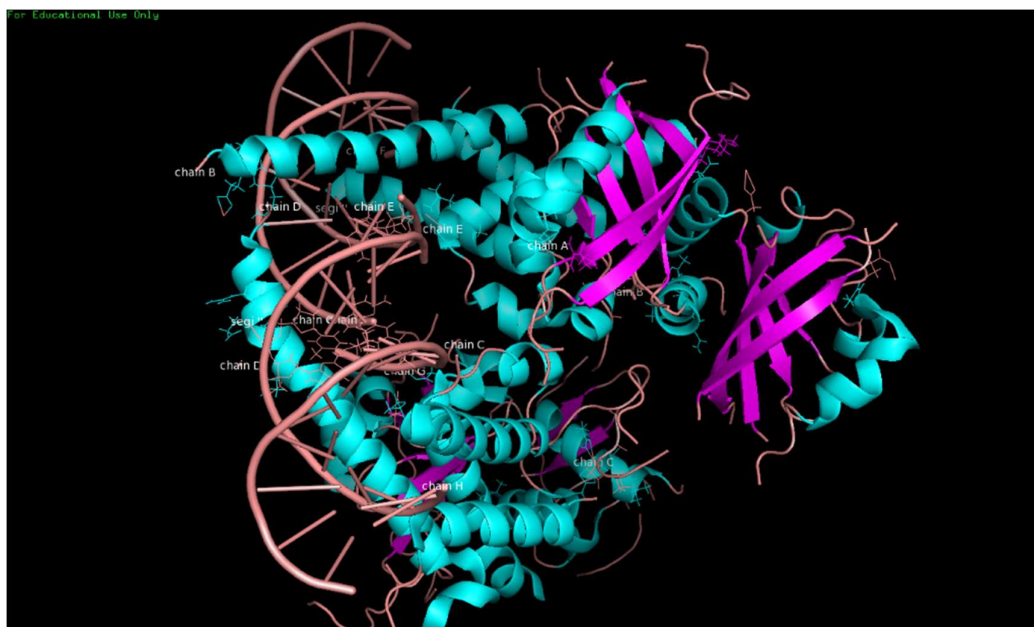[www.mdpi.com/journal/biosensors](http://www.mdpi.com/journal/biosensors)
